# Supplementary material for: Design and Reproducibility of a Mini-Survey to Evaluate the Quality of Food Intake (Mini-ECCA) in a Mexican Population
Source: MDPI journal article supplement (doi:10.3390/nu10040524), 2018-04-23

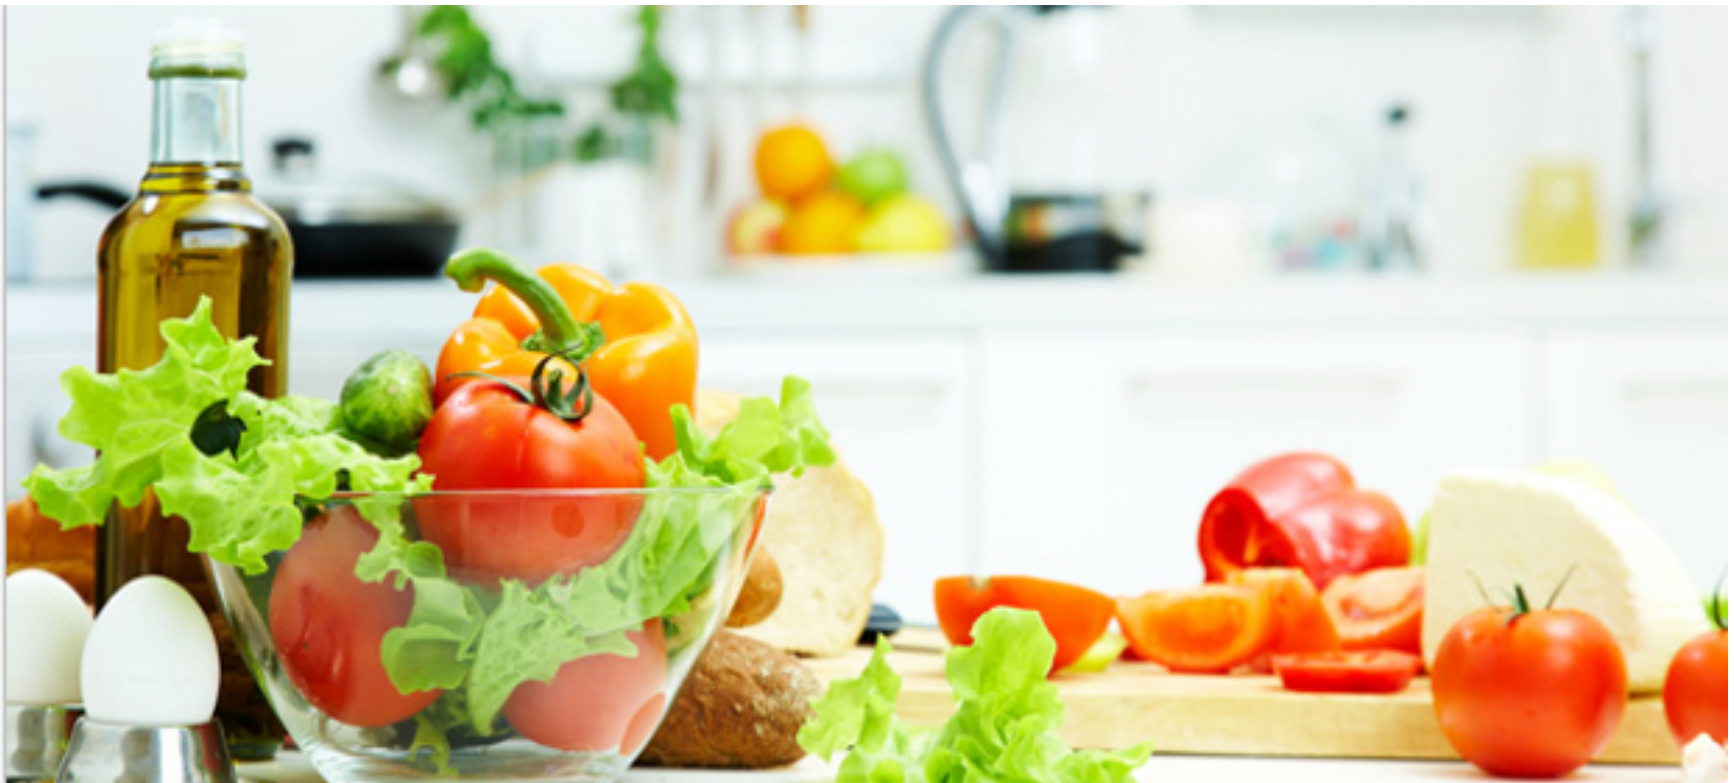

# Mini ECCA

Mini Encuesta de Calidad de Consumo Alimentario

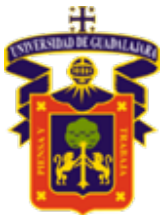

1. ¿Bebe, por lo menos, 1.5 litro de **agua natural** al día?

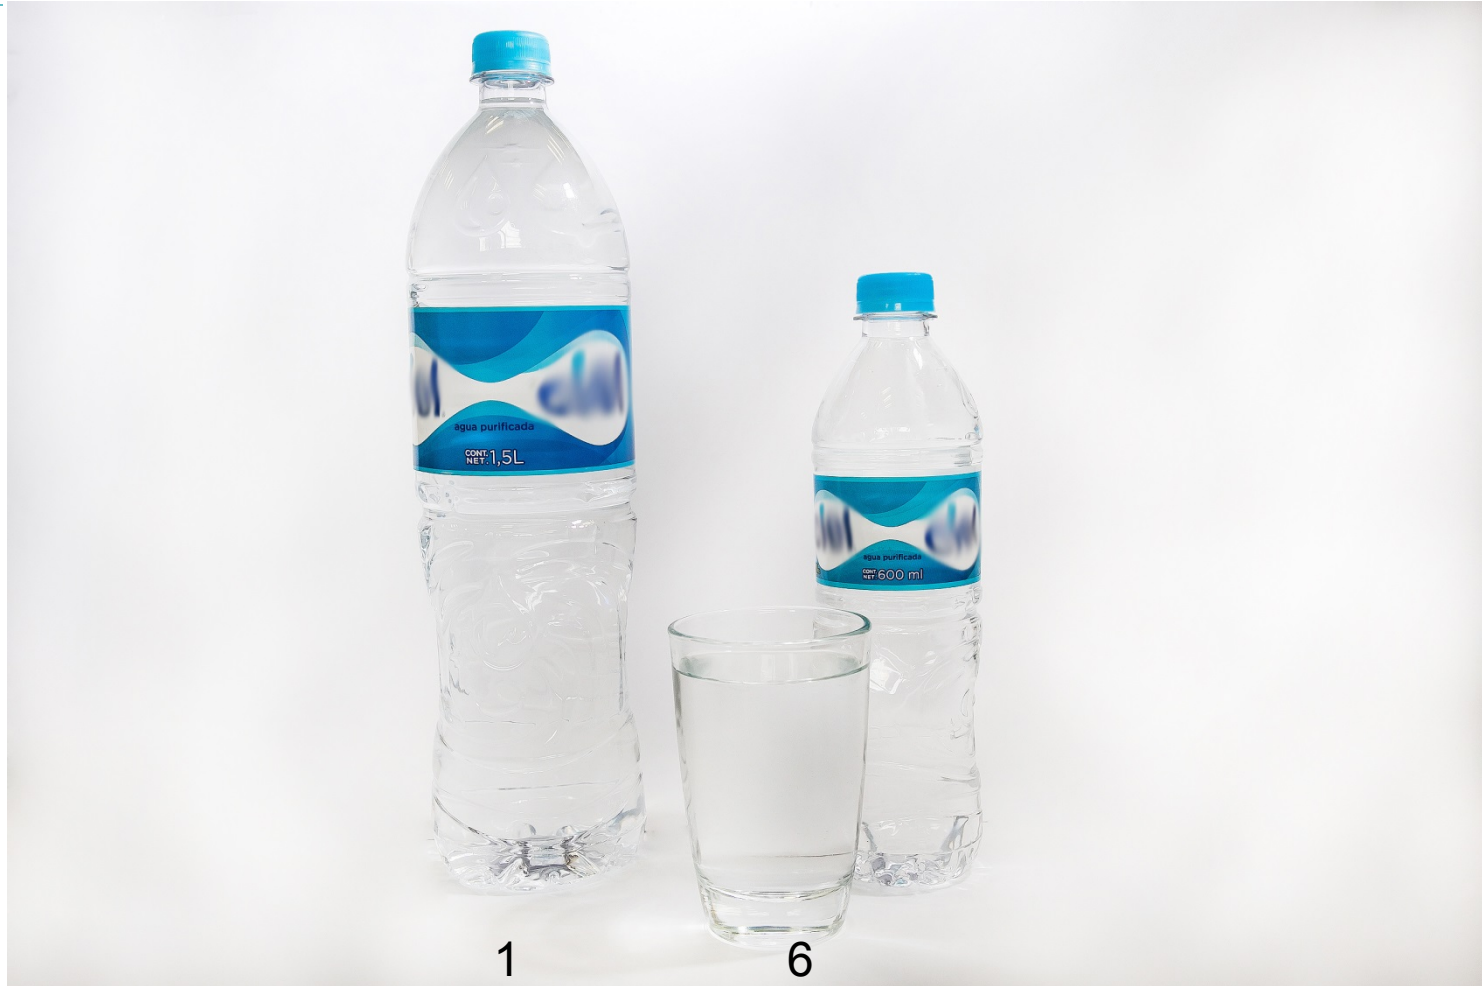

SI

1  
2.5

6

NO

2. ¿Consume por lo menos, 200g de **verduras** cocidas o crudas al día?

---

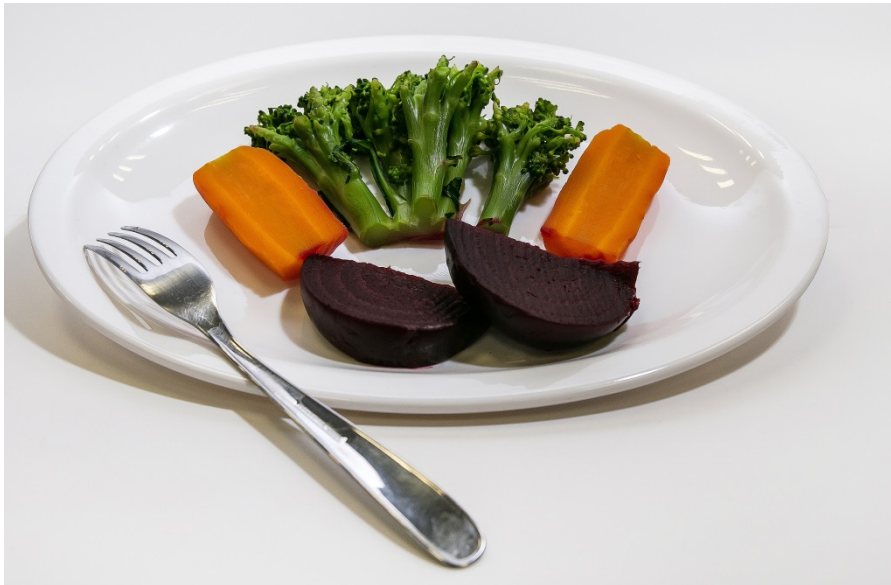

SI

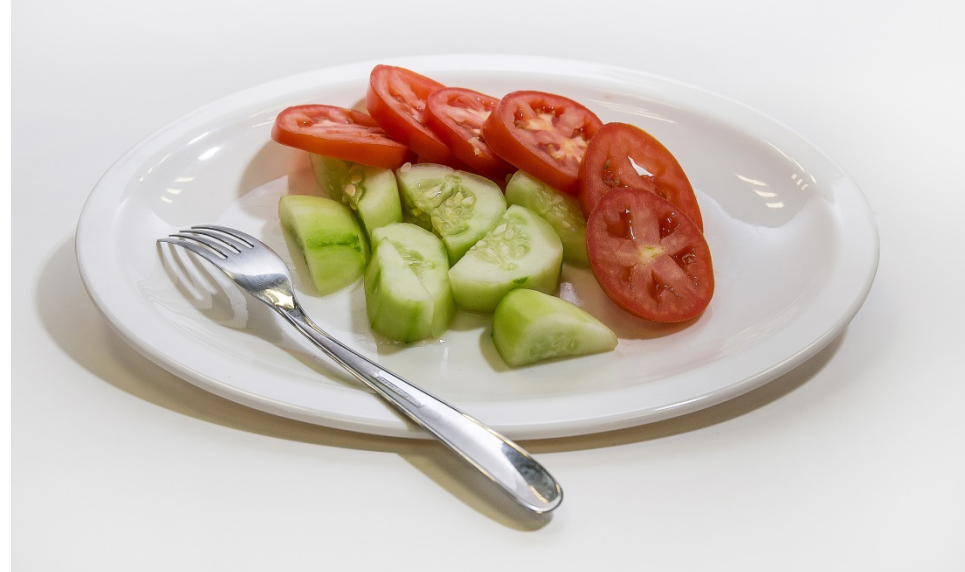

NO

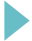



3. ¿Consume **pescado fresco o congelado** (100g) por lo menos, un día por semana?

---

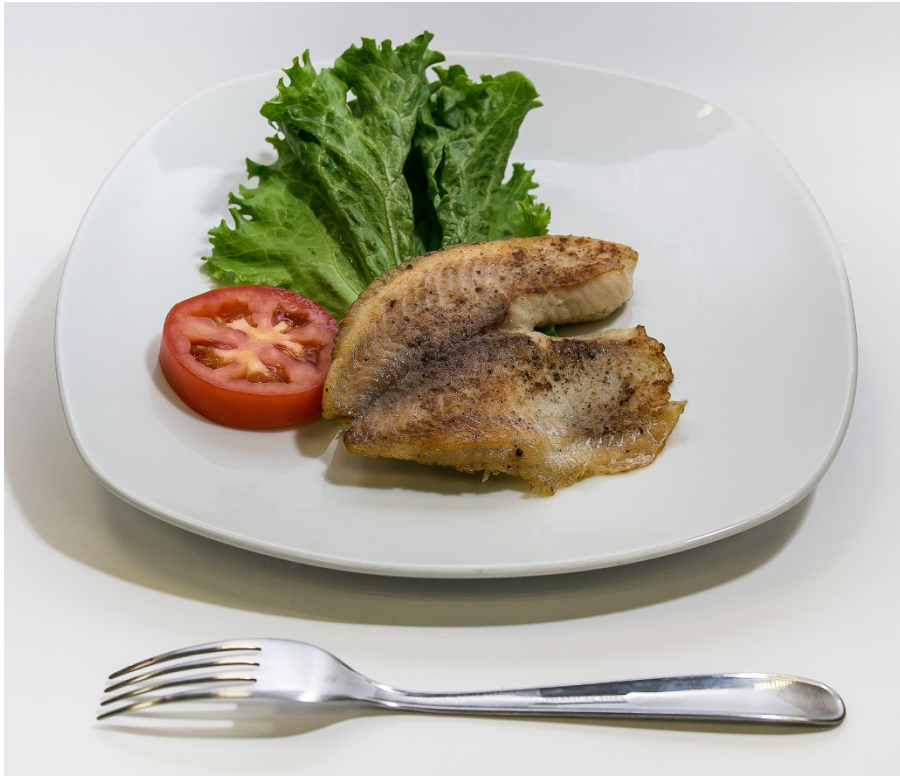

SI

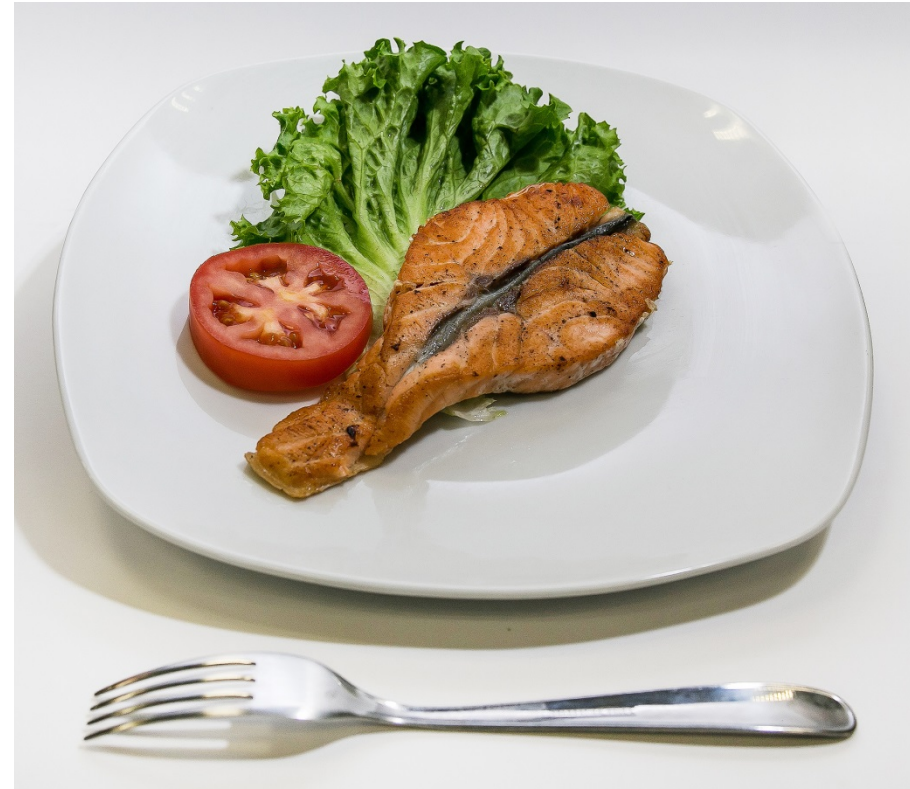

NO

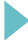

#### 4. ¿Consume 4 ó más **bebidas azucaradas** por semana?

---

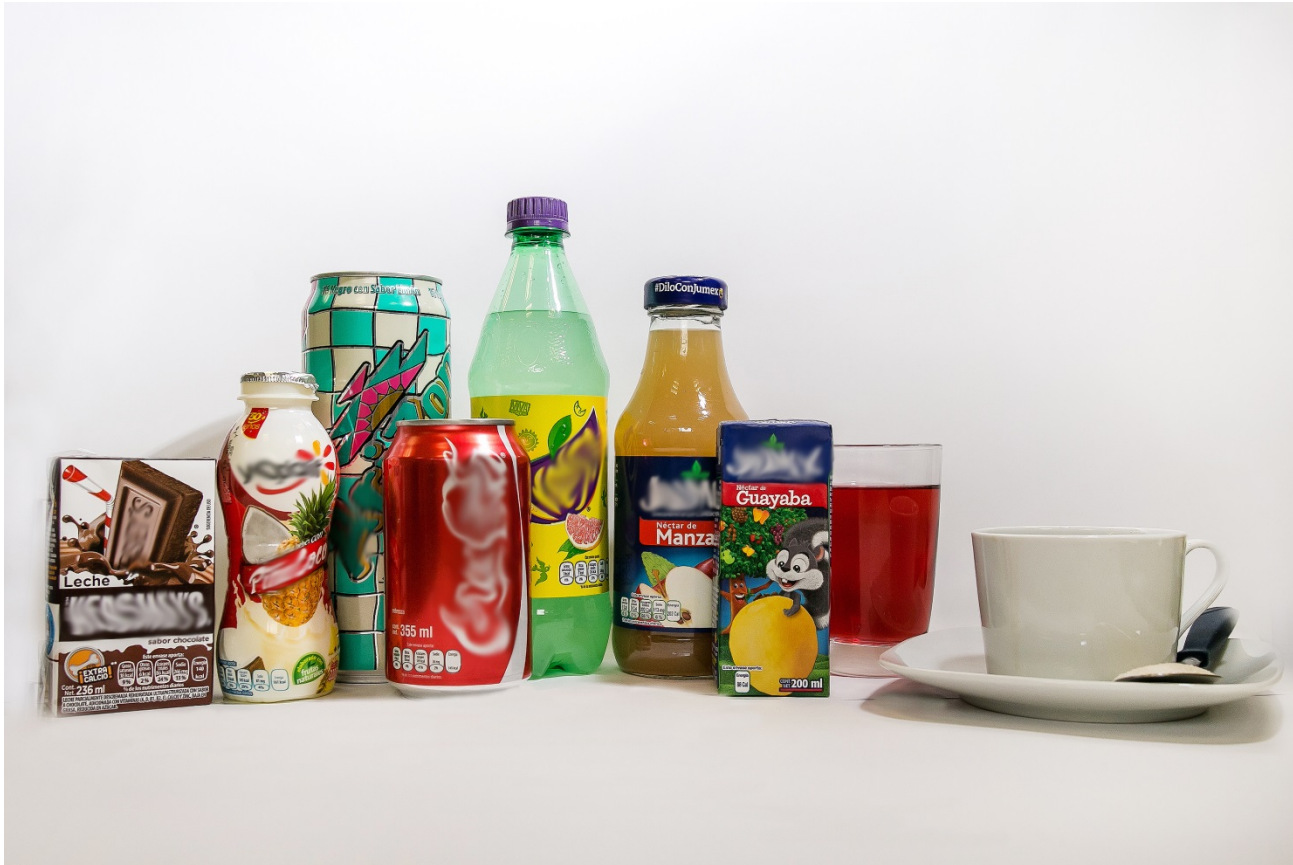

SI

NO

---

5. ¿Consume por lo menos, 200g de **frutas** al día?

---

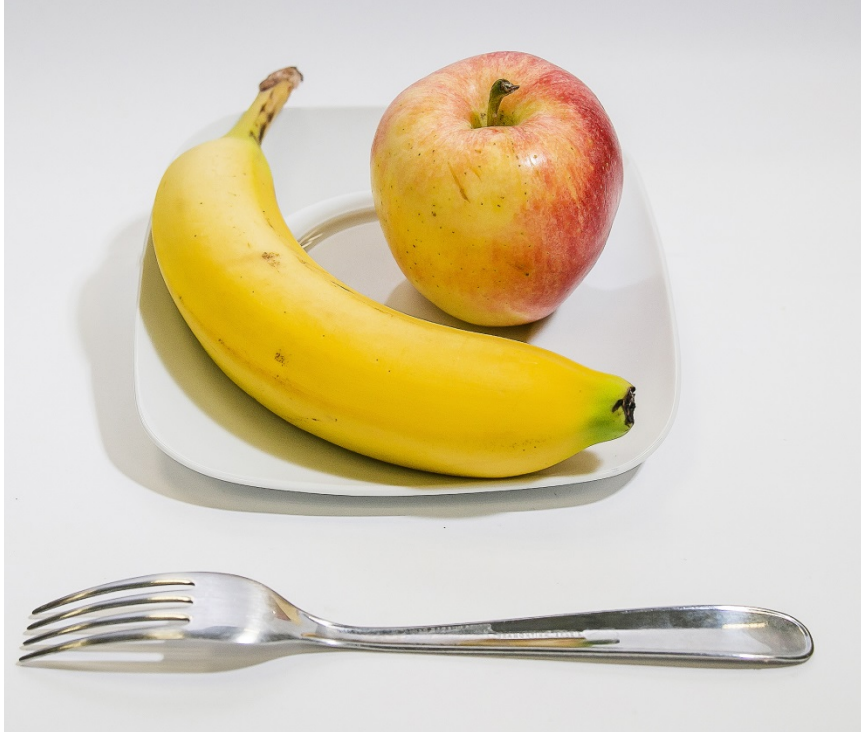

SI

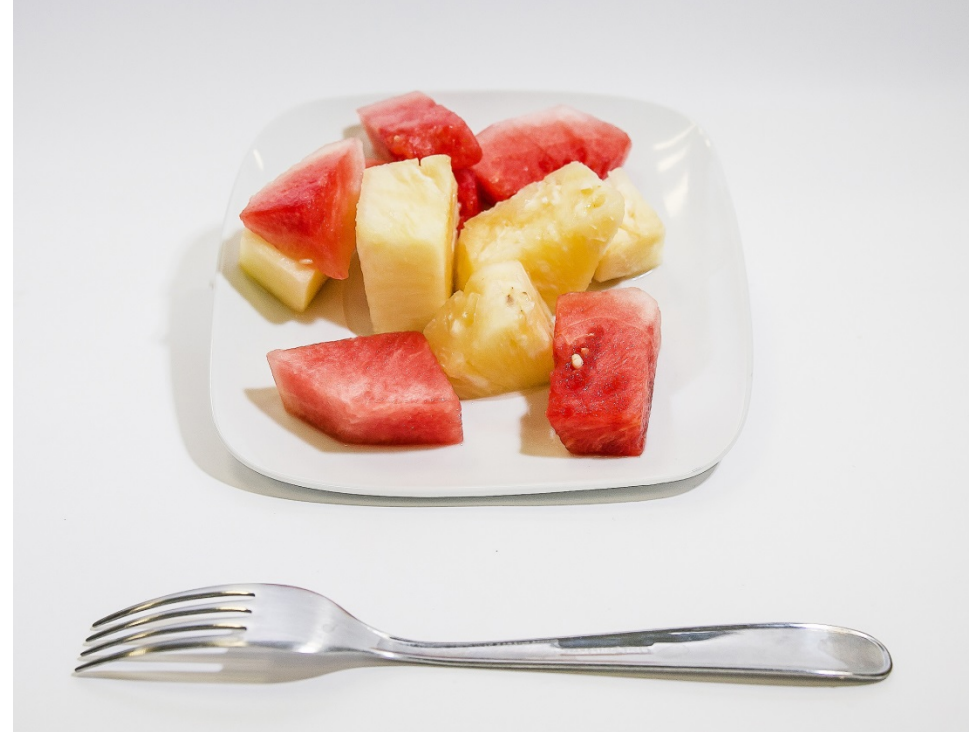

NO

---





5. ¿Consume por lo menos, 200g de **frutas** al día?

---

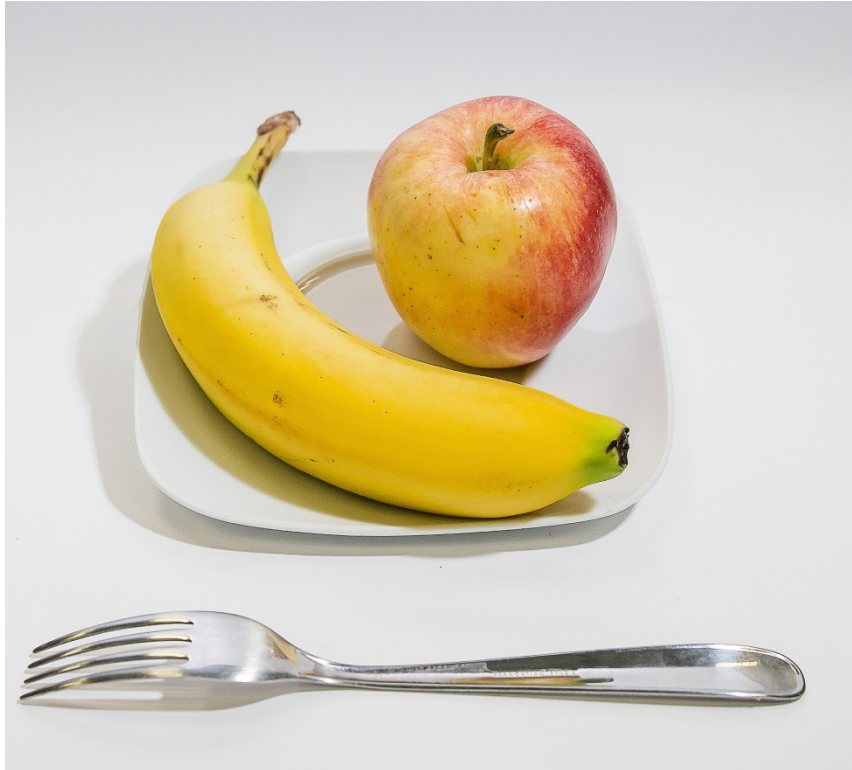

SI

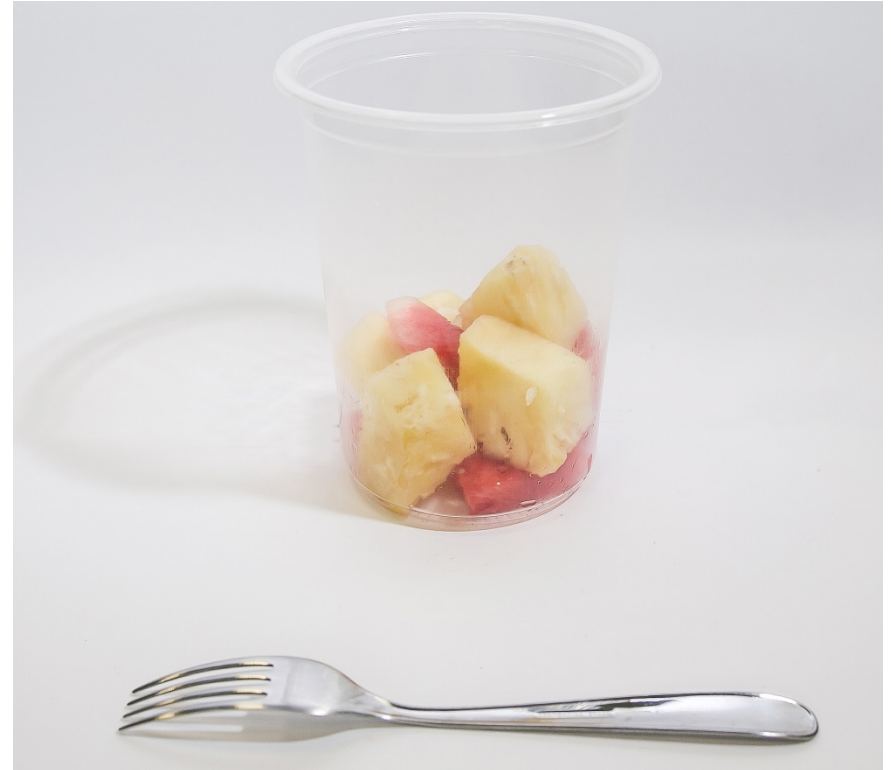

NO

---



## 6. ¿Cuál es la **grasa** que consume con mayor frecuencia en la semana?

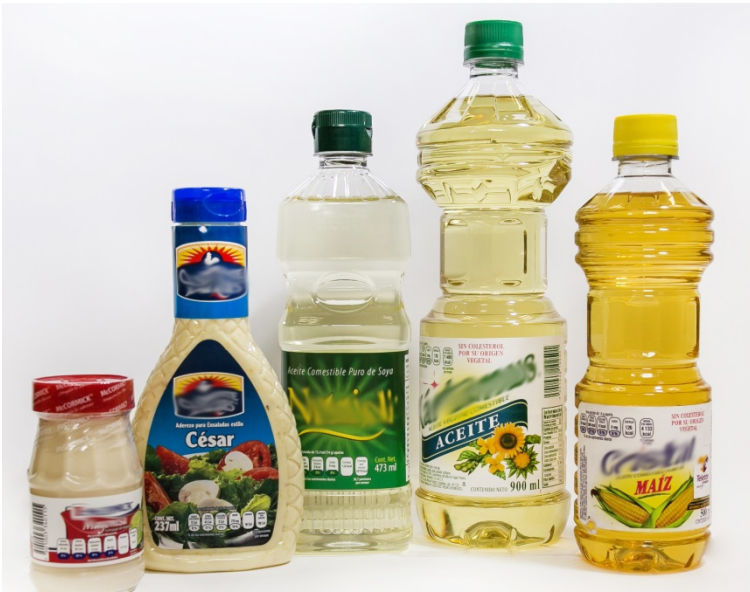

A

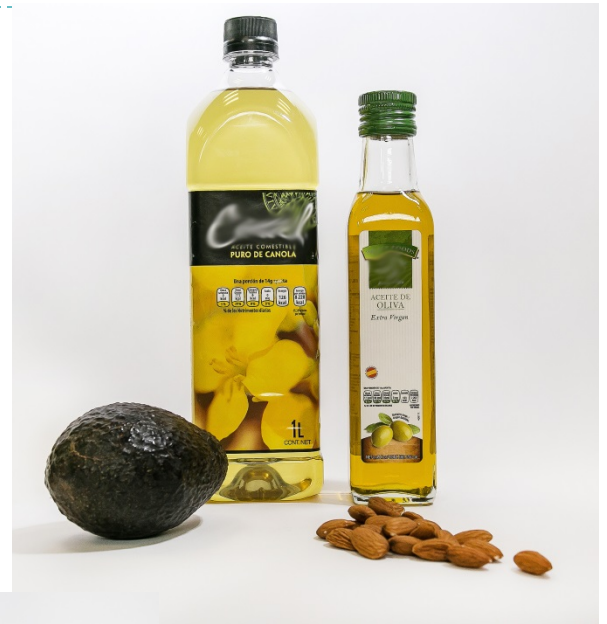

B

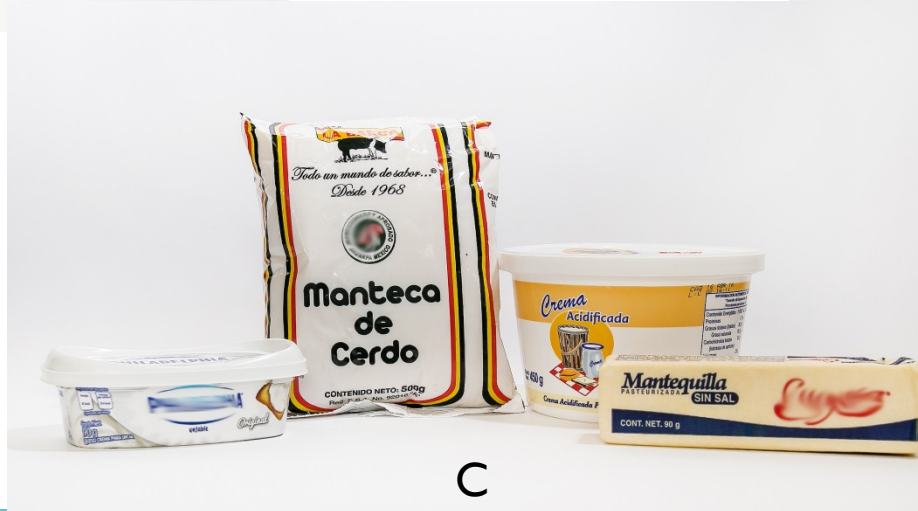

C

No sé



7. ¿Consume **alimentos no preparados** en casa, 3 ó más días por semana?

---

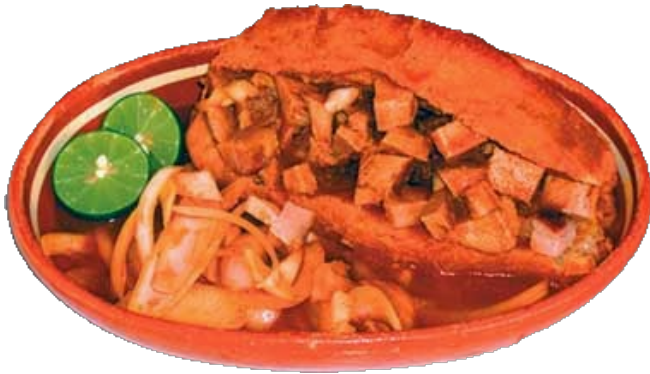

SI

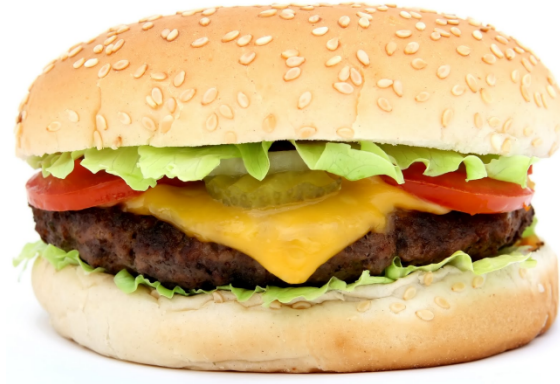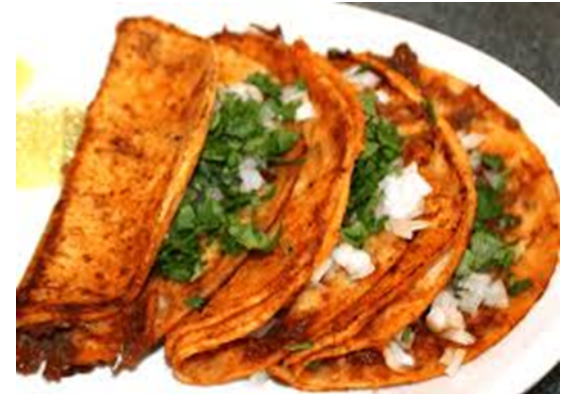

NO



8. ¿Qué tipo de carne consume con mayor frecuencia?

---

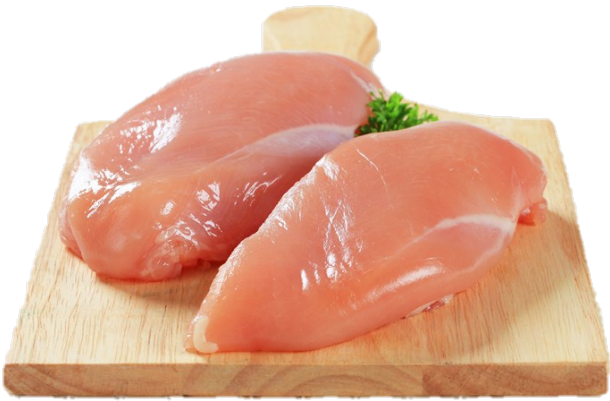

A

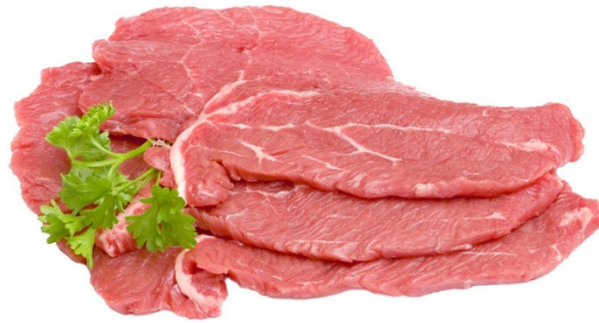

B

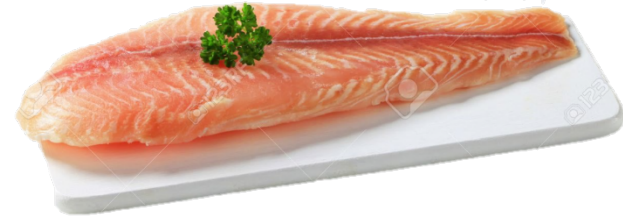

C

No sé

---



9. ¿Consume alimentos procesados (frituras, embutidos, platillos empaquetados listos para calentar y servir) 2 ó más días por semana?

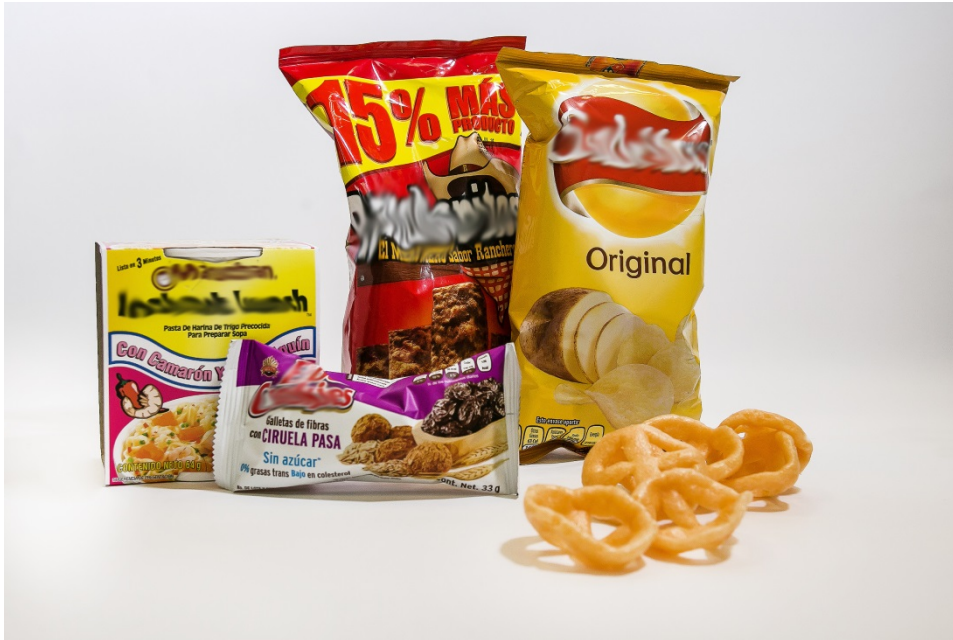

SI

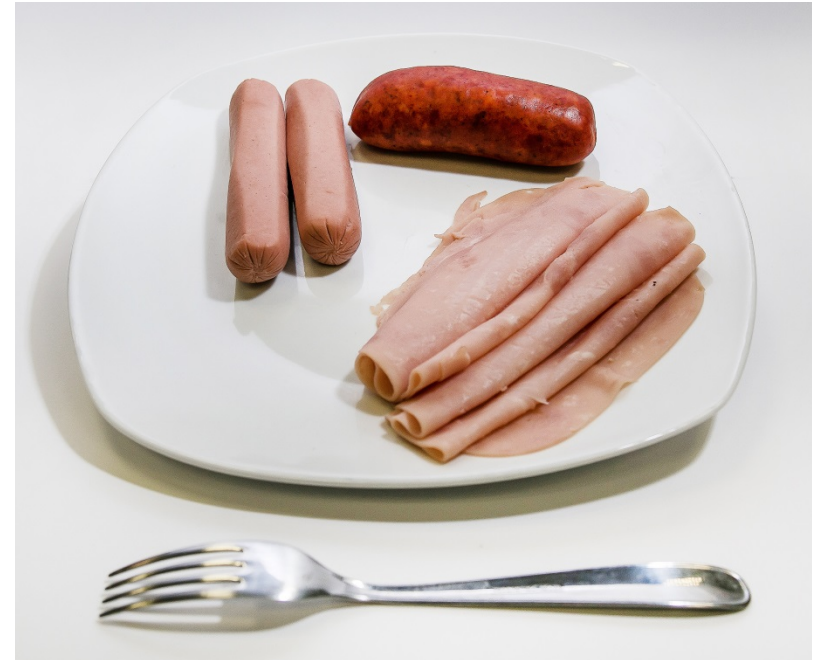

NO



10. ¿Consume **dulces o postres comerciales** 2 ó más días por semana?

---

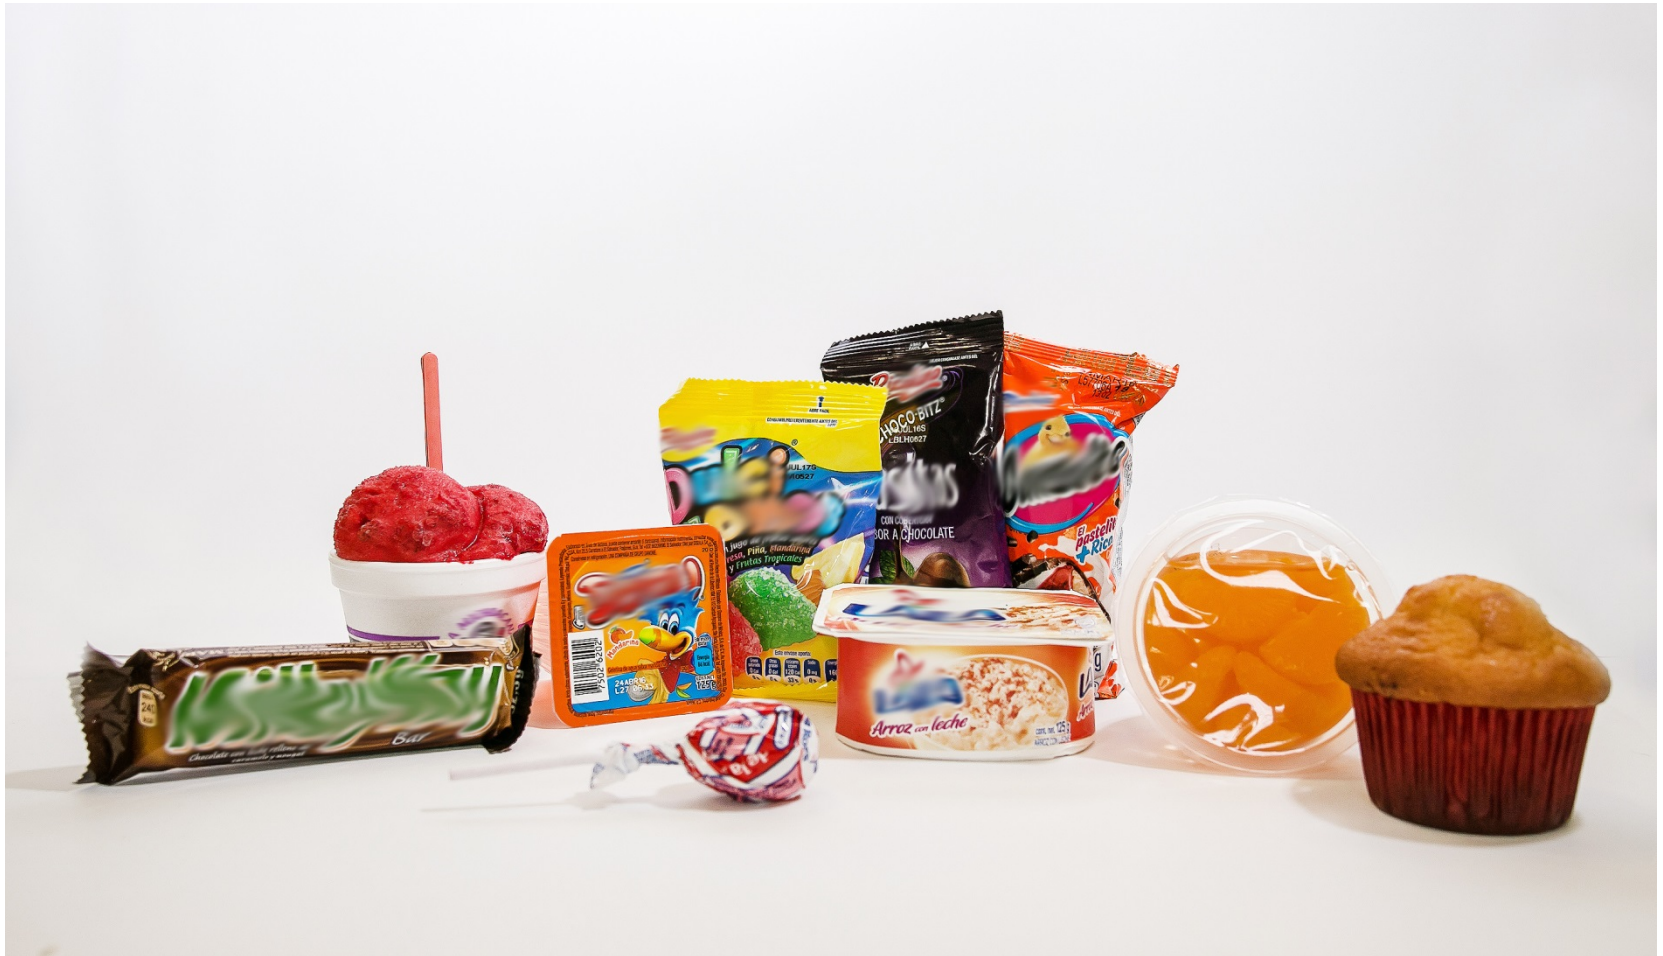

SI

NO

---



11. ¿Consume **leguminosas** por lo menos, 3 días a la semana (300g a la semana)?

---

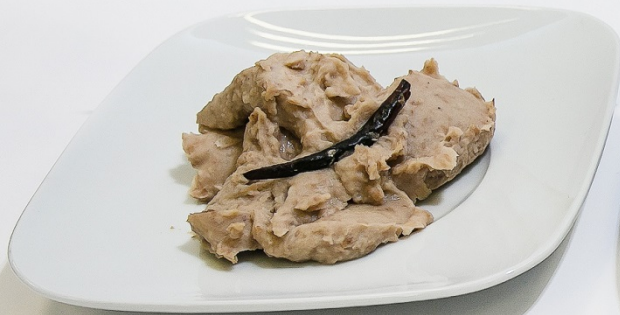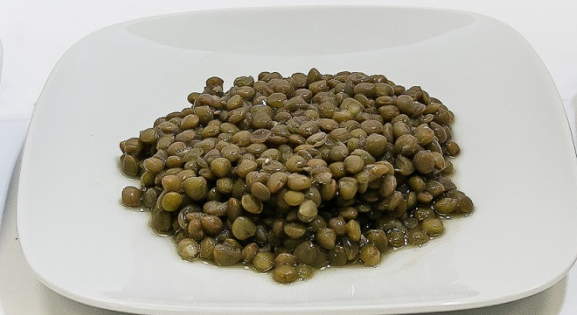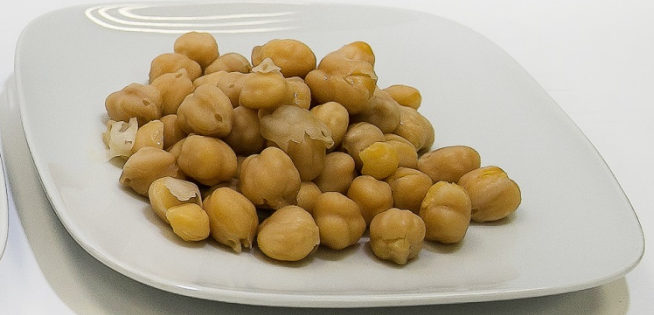

SI

NO



12. ¿Qué **cereales** consume con más frecuencia?

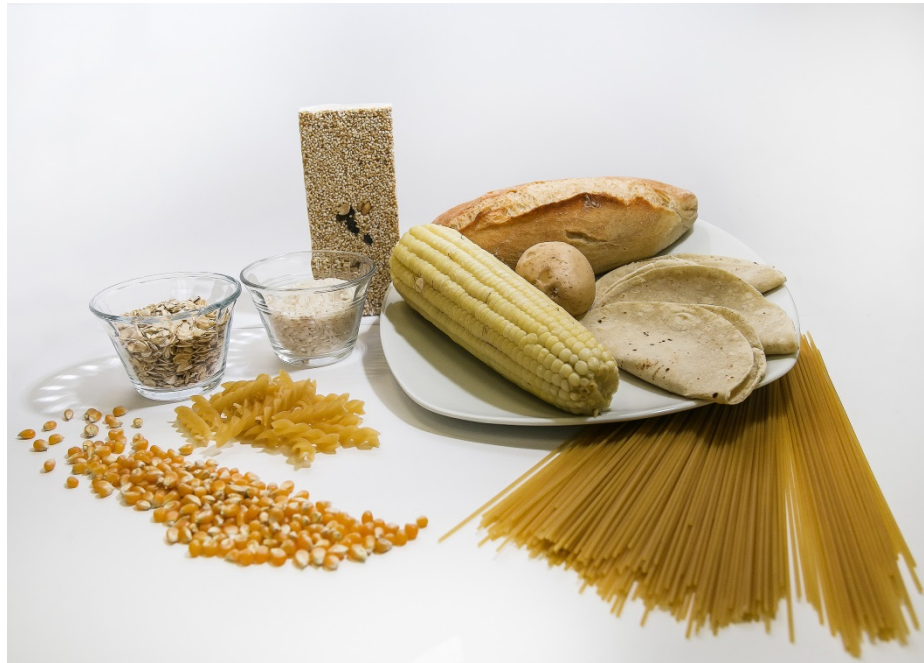

A

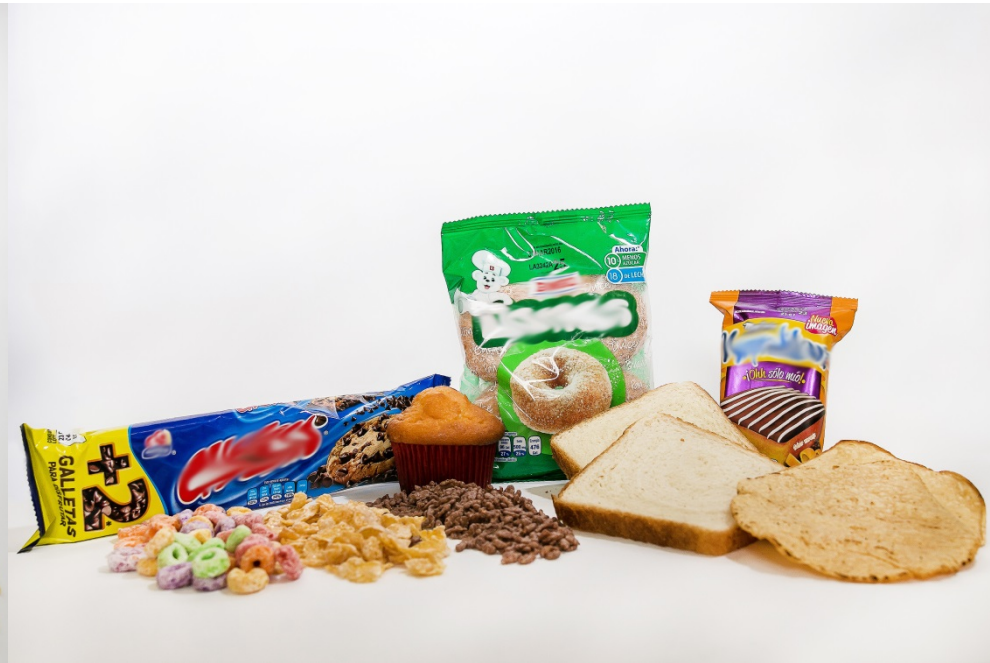

No sé

# B



Supplement: s1 [file s1]
