# Supplementary material for: Design and Reproducibility of a Mini-Survey to Evaluate the Quality of Food Intake (Mini-ECCA) in a Mexican Population
Source: MDPI journal article supplement (doi:10.3390/nu10040524), 2018-04-23
Supplement: s1 [file s1]

**Table S1: Mini-ECCA survey**

| No.             | Preguntas                                                                                                                                   | Respuestas                                                                                                                       | Puntaje obtenido         |
|-----------------|---------------------------------------------------------------------------------------------------------------------------------------------|----------------------------------------------------------------------------------------------------------------------------------|--------------------------|
| 1               | ¿Bebe, por lo menos 1.5 litros de <b>agua natural</b> al día?                                                                               | Sí <input type="checkbox"/> 1    No <input type="checkbox"/> 0                                                                   |                          |
| 2               | ¿Consume, por lo menos, 200g de <b>verduras</b> cocidas o crudas al día?                                                                    | Sí <input type="checkbox"/> 1    No <input type="checkbox"/> 0                                                                   |                          |
| 3               | ¿Consume <b>pescado fresco o congelado (100g)</b> por lo menos una vez a la semana?                                                         | Sí <input type="checkbox"/> 1    No <input type="checkbox"/> 0                                                                   |                          |
| 4               | ¿Consume 4 o más <b>bebidas azucaradas</b> al día?                                                                                          | Sí <input type="checkbox"/> 0    No <input type="checkbox"/> 1                                                                   |                          |
| 5               | ¿Consume, por lo menos, 200g de <b>frutas</b> al día?                                                                                       | Sí <input type="checkbox"/> 1    No <input type="checkbox"/> 0                                                                   |                          |
| 6               | ¿Cuál es la <b>grasa</b> que consume con mayor frecuencia en la semana?                                                                     | A <input type="checkbox"/> 0    B <input type="checkbox"/> 1    C <input type="checkbox"/> 0    No sé <input type="checkbox"/> 0 |                          |
| 7               | ¿Consume <b>alimentos no preparados</b> en casa, 3 o más días por semana?                                                                   | Sí <input type="checkbox"/> 0    No <input type="checkbox"/> 1                                                                   |                          |
| 8               | ¿Qué tipo de carne consume con mayor frecuencia?                                                                                            | A <input type="checkbox"/> 1    B <input type="checkbox"/> 0    C <input type="checkbox"/> 1    No sé <input type="checkbox"/> 0 |                          |
| 9               | ¿Consume <b>alimentos procesados</b> (frituras, embutidos, platillos empaquetados listos para calentar y servir) dos o más días por semana? | Sí <input type="checkbox"/> 0    No <input type="checkbox"/> 1                                                                   |                          |
| 10              | ¿Consume <b>dulces o postres comerciales</b> 2 o más días por semana?                                                                       | Sí <input type="checkbox"/> 0    No <input type="checkbox"/> 1                                                                   |                          |
| 11              | ¿Consume <b>leguminosas</b> por lo menos 3 veces a la semana (300g a la semana)?                                                            | Sí <input type="checkbox"/> 1    No <input type="checkbox"/> 0                                                                   |                          |
| 12              | ¿Qué <b>cereales</b> consume con más frecuencia?                                                                                            | A <input type="checkbox"/> 1    B <input type="checkbox"/> 0    No sé <input type="checkbox"/> 0                                 |                          |
| <b>Cribado:</b> |                                                                                                                                             |                                                                                                                                  |                          |
| 10, 11, 12      | Felicitaciones, tu alimentación es saludable                                                                                                |                                                                                                                                  | <b>Total de puntos =</b> |
| 7, 8, 9         | Buen trabajo, estás en el camino correcto.                                                                                                  |                                                                                                                                  |                          |
| 4, 5, 6         | Algo bajo, podrías mejorar                                                                                                                  |                                                                                                                                  |                          |
| 0, 1, 2, 3      | Estás en la zona de peligro, pero la honestidad es tu valor y te ayudará a mejorar.                                                         |                                                                                                                                  |                          |
